# Supplementary material for: Evidence-Based Approaches for Determining Effective Target Antigens to Develop Vaccines against Post-Weaning Diarrhea Caused by Enterotoxigenic Escherichia coli in Pigs: A Systematic Review and Network Meta-Analysis
Source: MDPI journal article supplement (doi:10.3390/ani12162136), 2022-08-19
Supplement: s1 [file s1]

### A. Subgroup analysis of mortality outcome by vaccine category

| Groups       | Number of studies | Effect size and 95% C.I |             |             | Test of null (2-Tail) |         | Heterogeneity |        |         |
|--------------|-------------------|-------------------------|-------------|-------------|-----------------------|---------|---------------|--------|---------|
|              |                   | Point estimate          | Lower limit | Upper limit | Z-value               | P-value | Q-value       | df (Q) | P-value |
| Experimental | 12                | 0.303                   | 0.182       | 0.504       | -4.593                | 0.000   | 2.001         | 1      | 0.157   |
| Commercial   | 3                 | 0.073                   | 0.011       | 0.490       | -2.697                | 0.007   |               |        |         |
| Overall      | 15                | 0.275                   | 0.168       | 0.451       | -5.135                | 0.000   |               |        |         |

### B. Subgroup analysis of mortality outcome by route of administration

| Groups     | Number of studies | Effect size and 95% C.I |             |             | Test of null (2-tail) |         | Heterogeneity |       |         |
|------------|-------------------|-------------------------|-------------|-------------|-----------------------|---------|---------------|-------|---------|
|            |                   | Point estimate          | Lower limit | Upper limit | Z-value               | P-value | Q-value       | df(Q) | P-value |
| Combined   | 3                 | 0.360                   | 0.178       | 0.731       | -2.829                | 0.005   | 1.806         | 3     | 0.614   |
| Intranasal | 3                 | 0.167                   | 0.043       | 0.648       | -2.588                | 0.010   |               |       |         |
| Oral       | 8                 | 0.199                   | 0.071       | 0.563       | -3.046                | 0.002   |               |       |         |
| Parenteral | 1                 | 0.086                   | 0.002       | 3.704       | -1.279                | 0.201   |               |       |         |
| Overall    | 15                | 0.266                   | 0.157       | 0.453       | -4.879                | 0.000   |               |       |         |
