# Supplementary material for: Evidence-Based Approaches for Determining Effective Target Antigens to Develop Vaccines against Post-Weaning Diarrhea Caused by Enterotoxigenic Escherichia coli in Pigs: A Systematic Review and Network Meta-Analysis
Source: MDPI journal article supplement (doi:10.3390/ani12162136), 2022-08-19
Supplement: s1 [file s1]

**1 Characteristics of 17 studies included in a systematic review and Bayesian network meta-analysis.**

| Author            | Trial             | Study design                   | Vaccine category                 | Vaccine dose                                                                | Weaning age | Time of vaccination | Vaccination route                                   | Adjuvant    | Control                     | Time of challenge                                                      | Sample size                                       | Follow-up | Extracted outcomes         |
|-------------------|-------------------|--------------------------------|----------------------------------|-----------------------------------------------------------------------------|-------------|---------------------|-----------------------------------------------------|-------------|-----------------------------|------------------------------------------------------------------------|---------------------------------------------------|-----------|----------------------------|
| Alexa 1995        | Alexa 1995a       | Experiment alstudy             | Experimental (Vaccine Candidate) | <b>Inact:</b> 1ml/pig (2x10^9CFU/ml)<br><b>Live:</b> 7ml/pig (2x10^9CFU/ml) | 35 days     | 34 & 35 daysold     | <b>Inact:</b> Parenteral (IM);<br><b>Live:</b> Oral | No adjuvant | No vaccine                  | <b>7dpsi</b> {ETEC strain No. 8943 (2x10^9 CFU/ml); 7ml/pig}           | <b>Vacc:</b> 6 pigs;<br><b>Ctrl:</b> 4 pigs       | 7dpc      | Diarrhea                   |
|                   | Alexa 1995b       | Field study<br><b>(Farm A)</b> | Experimental (Vaccine Candidate) | <b>Inact:</b> 1ml/pig (2x10^9CFU/ml)<br><b>Live:</b> 7ml/pig (2x10^9CFU/ml) | 35 days     | 34 & 35 daysold     | <b>Inact:</b> Parenteral (IM);<br><b>Live:</b> Oral | No adjuvant | No vaccine                  | <b>NA</b>                                                              | <b>Vacc:</b> 222 pigs;<br><b>Ctrl:</b> 232 pigs   | 14dpw     | Mortality                  |
|                   | Alexa 1995c       | Field study<br><b>(Farm B)</b> | Experimental (Vaccine Candidate) | <b>Inact:</b> 1ml/pig (2x10^9CFU/ml)<br><b>Live:</b> 7ml/pig (2x10^9CFU/ml) | 35 days     | 34 & 35 daysold     | <b>Inact:</b> Parenteral (IM);<br><b>Live:</b> Oral | No adjuvant | No vaccine                  | <b>NA</b>                                                              | <b>Vacc:</b> 255 pigs;<br><b>Ctrl :</b> 274 pigs  | 14dpw     | Mortality                  |
|                   | Alexa 1995d       | Field study<br><b>(Farm C)</b> | Experimental (Vaccine Candidate) | <b>Inact:</b> 1ml/pig (2x10^9CFU/ml)<br><b>Live:</b> 7ml/pig (2x10^9CFU/ml) | 35 days     | 34 & 35 daysold     | <b>Inact:</b> Parenteral (IM);<br><b>Live:</b> Oral | No adjuvant | No vaccine                  | <b>NA</b>                                                              | <b>Vacc:</b> 3692 pigs;<br><b>Ctrl:</b> 6301 pigs | 14dpw     | Mortality                  |
| Bozic et al.,2002 | Bozic et al. 2002 | Experiment alstudy             | Experimental (Vaccine Candidate) | 60ml/pig (10^10CFU)                                                         | 4 weeks     | 2dpw                | Oral                                                | No adjuvant | TSB (Trypti case soy broth) | <b>7dpi</b> {F4ac+ETEC strain (0149:K91:F4 ac: 987P:Hly+++ LT +STb+) } | <b>Vacc:</b> 6 pigs;<br><b>Ctrl:</b> 6 pigs       | 7dpc      | Diarrhea;<br><br>Mortality |

|                                 |                          |                    |                                  |                                                              |            |                                                      |      |             |                                  |                                                                                                                                                   |                                               |       |                        |
|---------------------------------|--------------------------|--------------------|----------------------------------|--------------------------------------------------------------|------------|------------------------------------------------------|------|-------------|----------------------------------|---------------------------------------------------------------------------------------------------------------------------------------------------|-----------------------------------------------|-------|------------------------|
| <b>Fairbrother et al., 2017</b> | Fairbrother et al. 2017a | Experimental study | Commercial                       | 150ml/pig (5.9x10 <sup>7</sup> CFU)                          | 18-19 days | 1dpw                                                 | Oral | No adjuvant | 150 ml filtered water            | <b>3dpi</b><br>{F4-ET EC EcL8559 O149 challenge strain}                                                                                           | <b>Vacc:</b> 20 pigs;<br><b>Ctrl:</b> 20 pigs | 5dpc  | Diarrhea;<br>ADWG      |
|                                 | Fairbrother et al. 2017b | Experimental study | Commercial                       | 150ml/pig (1.3x10 <sup>8</sup> CFU)                          | 18-19 days | 1dpw                                                 | Oral | No adjuvant | 150 ml filtered water            | <b>7dpi</b><br>{F4-ETEC EcL8559 O149 challenge strain}                                                                                            | <b>Vacc:</b> 10 pigs;<br><b>Ctrl:</b> 10 pigs | 3dpc  | Diarrhea;<br>ADWG      |
|                                 | Fairbrother et al. 2017c | Experimental study | Commercial                       | 150ml/pig (1.3x10 <sup>8</sup> CFU)                          | 18-19 days | 1dpw                                                 | Oral | No adjuvant | 150 ml filtered water            | <b>21dpi</b><br>{F4-ET EC EcL8559 O149 challenge strain}                                                                                          | <b>Vacc:</b> 10 pigs;<br><b>Ctrl:</b> 10 pigs | 3dpc  | Diarrhea;<br>ADWG      |
| <b>Francis et al., 1991</b>     | Francis et al. 1991a     | Experimental study | Experimental (Vaccine Candidate) | 3ml/pig (10 <sup>9</sup> CFU)                                | 10 days    | 14 & 19 days old                                     | Oral | No adjuvant | ETEC strain G58-1 (0101:K 28:NM) | <b>2wpi</b><br>{ETEC strain 3030-2 (0157:K88, LT+, STb+)}                                                                                         | <b>Vacc:</b> 33 pigs;<br><b>Ctrl:</b> 31 pigs | 2dpc  | Diarrhea;<br>Mortality |
|                                 | Francis et al. 1991b     | Experimental study | Experimental (Vaccine Candidate) | 3ml/pig (10 <sup>9</sup> CFU)                                | 10 days    | 14 & 19 days old                                     | Oral | No adjuvant | ETEC strain G58-1 (0101:K 28:NM) | <b>2wpi</b><br>{ETEC strain 3030-2 (0157:K88, LT+, STb+)}                                                                                         | <b>Vacc:</b> 18 pigs;<br><b>Ctrl:</b> 18 pigs | 2dpc  | Diarrhea;<br>Mortality |
|                                 | Francis et al. 1991c     | Experimental study | Experimental (Vaccine Candidate) | 3ml/pig (10 <sup>9</sup> CFU)                                | 10 days    | 14 & 19 days old                                     | Oral | No adjuvant | ETEC strain G58-1 (0101:K 28:NM) | <b>2wpi</b><br>{ETEC strain 3030-2 (0157:K88, LT+, STb+)}                                                                                         | <b>Vacc:</b> 14 pigs;<br><b>Ctrl:</b> 6 pigs  | 2dpc  | Diarrhea;<br>Mortality |
| <b>J.Lee et al., 2012</b>       | J.Lee et al. 2012        | Experimental study | Experimental (Vaccine Candidate) | 10ml/pig (2x10 <sup>10</sup> CFU) (vaccinated pregnant sows) | 28 days    | Vaccinated pregnant sows (8 & 11 weeks of pregnancy) | Oral | No adjuvant | 10ml PBS                         | <b>5 weeks of age</b><br>{Hemolytic wild type E.coli isolates JOL500 and JOL599 containing F18 and F4 genes respectively}                         | <b>Vacc:</b> 21 pigs;<br><b>Ctrl:</b> 23 pigs | 21dpc | Diarrhea               |
| <b>Jabif et al., 2021</b>       | Jabif et al. 2021        | Experimental study | Experimental (Vaccine Candidate) | 2ml/pig                                                      | 28 days    | 33 & 43 days of age                                  | Oral | No adjuvant | 2ml/pig saline solution          | <b>46 &amp; 47 days of age</b><br>{Two wild-type Enterotoxigenic E. coli (ETEC) field isolates, VBTEColi-1 and VBTEColi-2. (108 cfu/mL). 2ml/pig} | <b>Vacc:</b> 15 pigs;<br><b>Ctrl:</b> 15 pigs | 10dpc | Diarrhea;<br>ADWG      |

|                            |                     |                    |                                  |                                                             |         |                                                       |                 |             |                 |                                                                                                                                                                                                                                                                         |                                               |       |                   |
|----------------------------|---------------------|--------------------|----------------------------------|-------------------------------------------------------------|---------|-------------------------------------------------------|-----------------|-------------|-----------------|-------------------------------------------------------------------------------------------------------------------------------------------------------------------------------------------------------------------------------------------------------------------------|-----------------------------------------------|-------|-------------------|
| <b>Kovsca et al., 2009</b> | Kovsca et al. 2009  | Experimental study | Experimental (Vaccine Candidate) | 60ml/pig (10 <sup>10</sup> CFU F18ac)                       | 4 weeks | 2dpw                                                  | Oral            | Levamisole  | Saline solution | <b>7dpi</b><br>{F4ac+ETEC strain 11-800/1/94 (0149:K91:F4ac:987P: Hly+LT+STb+)}                                                                                                                                                                                         | <b>Vacc:</b> 5 pigs;<br><b>Ctrl:</b> 5 pigs   | 7dpc  | Diarrhea;<br>ADWG |
| <b>Kovsca et al., 2010</b> | Kovsca et al. 2010  | Experimental study | Experimental (Vaccine Candidate) | 60ml/pig (10 <sup>10</sup> CFU F4ac)                        | 4 weeks | 2dpw                                                  | Oral            | Levamisole  | 5ml saline      | <b>7dpi</b><br>{F4ac+ strain ETEC 11-800/1/94 (0149:K91:Fac:987P: Hly+LT+STb+)}                                                                                                                                                                                         | <b>Vacc:</b> 5 pigs;<br><b>Ctrl:</b> 5 pigs   | 7dpc  | Diarrhea;<br>ADWG |
| <b>Kovsca et al., 2011</b> | Kovsca et al. 2011a | Experimental study | Experimental (Vaccine Candidate) | 60ml/pig (10 <sup>10</sup> CFU F4ac+)                       | 4 weeks | 2dpw                                                  | Oral            | Levamisole  | 5ml saline      | <b>7dpi</b><br>{10 <sup>10</sup> CFU/ml: F4ac+ETEC strain 11-800/1/94 (019:K91:F4ac:987P: Hly+LT+STb+)}                                                                                                                                                                 | <b>Vacc:</b> 5 pigs;<br><b>Ctrl:</b> 5 pigs   | 7dpc  | Diarrhea;<br>ADWG |
|                            | Kovsca et al. 2011b | Experimental study | Experimental (Vaccine Candidate) | 60ml/pig (10 <sup>10</sup> CFU F18ac+)                      | 4 weeks | 2dpw                                                  | Oral            | Levamisole  | 5ml saline      | <b>7dpi</b><br>{10 <sup>10</sup> CFU/ml: F4ac+ETEC strain 11-800/1/94 (019:K91:F4ac:987P: Hly+LT+STb+)}                                                                                                                                                                 | <b>Vacc:</b> 5 pigs;<br><b>Ctrl:</b> 5 pigs   | 7dpc  | Diarrhea;<br>ADWG |
| <b>Lee et al., 2012</b>    | Lee et al. 2012a    | Experimental study | Experimental (Vaccine Candidate) | 10ml/pig (2x10 <sup>10</sup> CFU): vaccinated pregnant sows | 21 days | Vaccinated pregnant sows (8 & 11 weeks of pregnancy)  | Oral            | No adjuvant | 10ml PBS        | <b>1 week of age</b><br>{ <b>1.</b> JOL489 (Wild type F5+, F41+, LT+, stx2+ ETEC);<br><b>2.</b> JOL564 (Wild type F6+, stx1+, stx2+ ETEC);<br><b>3.</b> JOL599 (Wild type F4+, LT+, STa+, STb+, EAST 1+ ETEC). 3ml (1x10 <sup>9</sup> CFU/ml) of each challenge strain} | <b>Vacc:</b> 18 pigs;<br><b>Ctrl:</b> 18 pigs | 21dpc | Diarrhea          |
|                            | Lee et al. 2012b    | Experimental study | Commercial                       | NR                                                          | 21 days | Vaccinated pregnant sows (11 & 14 weeks of pregnancy) | Parenteral (IM) | No adjuvant | 10ml PBS        | <b>1 week of age</b><br>{ <b>1.</b> JOL489 (Wild type F5+, F41+, LT+, stx2+ ETEC);<br><b>2.</b> JOL564 (Wild type F6+, stx1+, stx2+ ETEC);<br><b>3.</b> JOL599 (Wild type F4+, LT+, STa+, STb+, EAST 1+ ETEC).                                                          | <b>Vacc:</b> 17 pigs;<br><b>Ctrl:</b> 18 pigs | 21dpc | Diarrhea          |

|                             |                     |                       |                                        |                                                                      |                                 |                                                                   |                    |                |             |                                                                                                                                                                                                                                                                                                               |                                                      |       |                        |
|-----------------------------|---------------------|-----------------------|----------------------------------------|----------------------------------------------------------------------|---------------------------------|-------------------------------------------------------------------|--------------------|----------------|-------------|---------------------------------------------------------------------------------------------------------------------------------------------------------------------------------------------------------------------------------------------------------------------------------------------------------------|------------------------------------------------------|-------|------------------------|
|                             |                     |                       |                                        |                                                                      |                                 |                                                                   |                    |                |             | 3ml<br>(1x10 <sup>9</sup> CFU/ml)<br>of each challenge<br>strain }                                                                                                                                                                                                                                            |                                                      |       |                        |
|                             | Lee et al.<br>2012c | Experimental<br>study | Experimental<br>(Vaccine<br>Candidate) | 10ml/pig<br>(2x10 <sup>10</sup> CFU):<br>vaccinated<br>pregnant sows | 21 days                         | Vaccinated<br>pregnant<br>sows (8 & 11<br>weeks of<br>pregnancy)  | Oral               | No<br>adjuvant | 10ml<br>PBS | <b>3 weeks of age</b><br>{ <b>1.</b> JOL489<br>(Wild type F5+,<br>F41+, LT+,<br>stx2+ ETEC);<br><b>2.</b> JOL564 (Wild<br>type F6+, stx1+,<br>stx2+ ETEC);<br><b>3.</b> JOL599 (Wild<br>type F4+, LT+,<br>STa+, STb+,<br>EAST 1+ ETEC).<br>3ml<br>(1x10 <sup>9</sup> CFU/ml)<br>of each challenge<br>strain } | <b>Vacc:</b> 19<br>pigs;<br><br><b>Ctrl:</b> 16 pigs | 21dpc | Diarrhea               |
|                             | Lee et al.<br>2012d | Experimental<br>study | Commercial                             | NR                                                                   | 21 days                         | Vaccinated<br>pregnant<br>sows (11 &<br>14 weeks of<br>pregnancy) | Parenteral<br>(IM) | No<br>adjuvant | 10ml<br>PBS | <b>3 weeks of age</b><br>{ <b>1.</b> JOL489<br>(Wild type F5+,<br>F41+, LT+,<br>stx2+ ETEC);<br><b>2.</b> JOL564 (Wild<br>type F6+, stx1+,<br>stx2+ ETEC);<br><b>3.</b> JOL599 (Wild<br>type F4+, LT+,<br>STa+, STb+,<br>EAST 1+ ETEC).<br>3ml<br>(1x10 <sup>9</sup> CFU/ml)<br>of each challenge<br>strain } | <b>Vacc:</b> 19<br>pigs;<br><br><b>Ctrl:</b> 16 pigs | 21dpc | Diarrhea               |
| <b>Lin et al.,<br/>2013</b> | Lin et al.<br>2013a | Experimental<br>study | Experimental<br>(Vaccine<br>Candidate) | 100µg LT                                                             | NA<br>(Gnotobio<br>tic piglets) | 10 and 17<br>days of age                                          | Parenteral<br>(IN) | No<br>adjuvant | 1ml PBS     | <b>7dpsi</b><br>{E. coli strain<br>3030-2<br>(O157:K88ac+/L<br>T+/STb+).<br>3ml TSB<br>(2x10 <sup>9</sup> CFU)}                                                                                                                                                                                               | <b>Vacc:</b> 7 pigs;<br><br><b>Ctrl:</b> 19 pigs     | 4dpc  | Mortality;<br><br>ADWG |
|                             | Lin et al.<br>2013b | Experimental<br>study | Experimental<br>(Vaccine<br>Candidate) | 300µg K88                                                            | NA<br>(Gnotobio<br>tic piglets) | 10 and 17<br>days of age                                          | Parenteral<br>(IN) | No<br>adjuvant | 1ml PBS     | <b>7dpsi</b><br>{E. coli strain<br>3030-2<br>(O157:K88ac+/L<br>T+/STb+).<br>3ml TSB<br>(2x10 <sup>9</sup> CFU)}                                                                                                                                                                                               | <b>Vacc:</b> 8 pigs;<br><br><b>Ctrl:</b> 19 pigs     | 4dpc  | Mortality;<br><br>ADWG |

|                              |                       |                    |                                  |                                                                                                                              |                          |                           |                 |                                    |                                            |                                                                                                                  |                                               |      |                           |
|------------------------------|-----------------------|--------------------|----------------------------------|------------------------------------------------------------------------------------------------------------------------------|--------------------------|---------------------------|-----------------|------------------------------------|--------------------------------------------|------------------------------------------------------------------------------------------------------------------|-----------------------------------------------|------|---------------------------|
|                              | Lin et al. 2013c      | Experimental study | Experimental (Vaccine Candidate) | 300µg K88 + 100µg LT                                                                                                         | NA (Gnotobiotic piglets) | 10 and 17 days of age     | Parenteral (IN) | No adjuvant                        | 1ml PBS                                    | <b>7dpi</b><br>{E. coli strain 3030-2 (O157:K88ac+/LT+/STb+). 3mlTSB (2x10 <sup>9</sup> CFU)}                    | <b>Vacc:</b> 20 pigs;<br><b>Ctrl:</b> 19 pigs | 4dpc | Mortality;<br>ADWG        |
| <b>Nadeau et al., 2017</b>   | Nadeau et al. 2017a   | Experimental study | Commercial                       | 120ml/pig (2.8 × 10 <sup>8</sup> CFU F18 and 1.6 × 10 <sup>8</sup> CFU F4)                                                   | 16-18 days of age        | 17-19 days                | Oral            | No adjuvant                        | No vaccine                                 | <b>7dpi</b><br>{0138 F18-ETEC 9910297-2STM (Positive for STb, LT, East-1, Stx2e, F18ab)}                         | <b>Vacc:</b> 12 pigs;<br><b>Ctrl:</b> 12 pigs | 7dpc | Diarrhea; Mortality; ADWG |
|                              | Nadeau et al. 2017b   | Experimental study | Commercial                       | 120ml/pig (2.8 × 10 <sup>8</sup> CFU F18 and 1.6 × 10 <sup>8</sup> CFU F4)                                                   | 16-18 days of age        | 17-19 days                | Oral            | No adjuvant                        | No vaccine                                 | <b>21dpi</b><br>{0138 F18-ETEC 9910297-2STM (Positive for STb, LT, East-1, Stx2e, F18ab)}                        | <b>Vacc:</b> 12 pigs;<br><b>Ctrl:</b> 12 pigs | 7dpc | Diarrhea; Mortality; ADWG |
|                              | Nadeau et al. 2017c   | Experimental study | Commercial                       | 150ml/pig (1.1 × 10 <sup>8</sup> CFU F18 and 5.8 × 10 <sup>7</sup> CFU F4)                                                   | 16-18 days of age        | 17-19 days                | Oral            | No adjuvant                        | No vaccine                                 | <b>7dpi</b><br>{nalidixic acid resistant 0149F4-ETEC EcL8559 (Positive for STa, STb, LT, East-1, F4ac)}          | <b>Vacc:</b> 10 pigs;<br><b>Ctrl:</b> 10 pigs | 7dpc | Diarrhea; Mortality; ADWG |
|                              | Nadeau et al. 2017d   | Experimental study | Commercial                       | 150ml/pig (1.1 × 10 <sup>8</sup> CFU F18 and 5.8 × 10 <sup>7</sup> CFU F4)                                                   | 16-18 days of age        | 17-19 days                | Oral            | No adjuvant                        | No vaccine                                 | <b>21dpi</b><br>{nalidixic acid resistant 0149F4-ETEC EcL8559 (Positive for STa, STb, LT, East-1, F4ac)}         | <b>Vacc:</b> 10 pigs;<br><b>Ctrl:</b> 9 pigs  | 7dpc | Diarrhea; ADWG            |
| <b>Ruan et al., 2011</b>     | Ruan et al. 2011      | Experimental study | Experimental (Vaccine Candidate) | 100 µl/pig (100 µg FaeG-FedF-LT 192A2:B fusion)                                                                              | NA (Gnotobiotic piglets) | 5 days and 2 weeks of age | Parenteral (IM) | Incomplete Freund adjuvant (Sigma) | No vaccine                                 | <b>2wpsi</b><br>{3 × 10 <sup>9</sup> CFU of the ETEC strain 3030-2 (K88ac/LT/STb)}                               | <b>Vacc:</b> 3 pigs;<br><b>Ctrl:</b> 3 pigs   | 2dpc | Diarrhea; Mortality       |
| <b>Ruan et al., 2013</b>     | Ruan et al. 2013      | Experimental study | Experimental (Vaccine Candidate) | 7.5x10 <sup>9</sup> CFU (1FaeG-FedF-LT 192A2:5LTB fusion)                                                                    | NA (Gnotobiotic piglets) | 4-5 day of age            | Oral            | No adjuvant                        | Host strain 8795                           | <b>16 days of age</b><br>{8x10 <sup>10</sup> CFU/ml ETEC strain 3030-2 (K88ac+/LT+/STb+)}                        | <b>Vacc:</b> 6 pigs;<br><b>Ctrl:</b> 4 pigs   | 1dpc | Diarrhea; Mortality       |
| <b>Santiago et al., 2012</b> | Santiago et al. 2012a | Experimental study | Experimental (Vaccine Candidate) | 3ml/pig (3x10 <sup>9</sup> CFU F4ac+ ETEC strain 8017). (K88ac+; enterotoxin negative control; Hy-) mixed with milk replacer | NA (Gnotobiotic piglets) | 5 days of age             | Oral            | No adjuvant                        | 3ml Lactose broth mixed with milk replacer | <b>1dpi</b><br>{ETEC Strain 3030-2 (K88+/LT/STb). 3ml/ piglet (3x10 <sup>10</sup> CFU) mixed with milk replacer} | <b>Vacc:</b> 8 pigs;<br><b>Ctrl:</b> 9 pigs   | 1dpc | Diarrhea                  |

|                                  |                            |                    |                                  |                                                                                                                                           |                          |                     |                 |                            |                                            |                                                                                                               |                                             |       |           |
|----------------------------------|----------------------------|--------------------|----------------------------------|-------------------------------------------------------------------------------------------------------------------------------------------|--------------------------|---------------------|-----------------|----------------------------|--------------------------------------------|---------------------------------------------------------------------------------------------------------------|---------------------------------------------|-------|-----------|
|                                  | Santiago et al. 2012b      | Experimental study | Experimental (Vaccine Candidate) | 3ml/pig (3x10 <sup>9</sup> CFU F4ac+ ETEC strain 8221). (K88ac+; LT mutant [LT(R192G)]; Hy-) mixed with milk replacer                     | NA (Gnotobiotic piglets) | 5 days of age       | Oral            | No adjuvant                | 3ml Lactose broth mixed with milk replacer | <b>1dpi</b> {ETEC Strain 3030-2 (K88+/LT/STb). 3ml/ piglet (3x10 <sup>10</sup> CFU) mixed with milk replacer} | <b>Vacc:</b> 7 pigs;<br><b>Ctrl:</b> 9 pigs | 1 dpc | Diarrhea  |
|                                  | Santiago et al. 2012c      | Experimental study | Experimental (Vaccine Candidate) | 3ml/pig (3x10 <sup>9</sup> CFU F4ac+ ETEC strain 8488). (K88ac+; LT mutant fused with STb [LT (R192G)-STb]; Hy-) mixed with milk replacer | NA (Gnotobiotic piglets) | 5 days of age       | Oral            | No adjuvant                | 3ml Lactose broth mixed with milk replacer | <b>1dpi</b> {ETEC Strain 3030-2 (K88+/LT/STb). 3ml/ piglet (3x10 <sup>10</sup> CFU) mixed with milk replacer} | <b>Vacc:</b> 7 pigs;<br><b>Ctrl:</b> 9 pigs | 1 dpc | Diarrhea  |
| <b>Srivastava et al. 2016</b>    | Srivastava et al. 2016a    | Experimental study | Experimental (Vaccine Candidate) | 2mg F4 fimbriae loaded in porous tablets                                                                                                  | 4 weeks                  | 1wpw                | Oral            | No adjuvant                | PBS                                        | <b>35 days of age</b> {ETEC strain GIS 26 (0149:K91:F4ac, LT+,STa+,STb+) 2x10 <sup>9</sup> CFU/ml}            | <b>Vacc:</b> 4 pigs;<br><b>Ctrl:</b> 4 pigs | 7dpc  | Diarrhea; |
| <b>Van Der Stede et al.,2003</b> | Van der Stede et al. 2003a | Experimental study | Experimental (Vaccine Candidate) | 100µg F4 fimbriae                                                                                                                         | 29 days                  | 8 & 25 days of life | Parenteral (IM) | Incomplete Freund adjuvant | PBS + IFA                                  | <b>8dpsi</b> {F4+-ETEC strain GIS26}                                                                          | <b>Vacc:</b> 5 pigs;<br><b>Ctrl:</b> 5 pigs | 7dpc  | ADWG      |
|                                  | Van der Stede et al. 2003b | Experimental study | Experimental (Vaccine Candidate) | 100µg F4 fimbriae + 2µg of 1α,25 (OH)2D3                                                                                                  | 29 days                  | 8 & 25 days of life | Parenteral (IM) | Incomplete Freund adjuvant | PBS + IFA                                  | <b>8dpsi</b> {F4+-ETEC strain GIS26}                                                                          | <b>Vacc:</b> 5 pigs;<br><b>Ctrl:</b> 5 pigs | 7dpc  | ADWG      |
|                                  | Van der Stede et al. 2003c | Experimental study | Experimental (Vaccine Candidate) | 100µg of F4 fimbriae + 500µg of CpG-ODN                                                                                                   | 29 days                  | 8 & 25 days of life | Parenteral (IM) | Incomplete Freund adjuvant | PBS + IFA                                  | <b>8dpsi</b> {F4+-ETEC strain GIS26}                                                                          | <b>Vacc:</b> 5 pigs;<br><b>Ctrl:</b> 5 pigs | 7dpc  | ADWG      |

Each row in this table corresponds to 1 trial. Different trials from the same publication are indicated by letters a, b, c and d

**Abbreviations:** **Inact:** Inactivated vaccine; **Live:** Live attenuated vaccine; **IM:** Intramuscular; **dpsi:** day post-secondary immunization; **NA:** Not applicable; **Vacc:** Vaccinated; **Ctrl:** Control; **dpc:** day post challenge; **dpw:** day post weaning; **CFU:** Colony Forming Unit; **dbw:** day before weaning; **NR:** Not reported; **dpi:** day post immunization; **dppi:** day post primary immunization; **TSB:** Trypticase soy broth; **ADWG:** average daily weight gain; **wpi:** week post immunization; **PBS:** phosphate buffered saline; **IN:** Intranasal; **dpsi:** day post-secondary immunization; **LT:** Heat labile enterotoxin; **wpw:** week post weaning; **wpti:** week post third immunisation; **CT:** Cholera toxin; **IFA:** Incomplete Freund adjuvant
