# Supplementary material for: Evidence-Based Approaches for Determining Effective Target Antigens to Develop Vaccines against Post-Weaning Diarrhea Caused by Enterotoxigenic Escherichia coli in Pigs: A Systematic Review and Network Meta-Analysis
Source: MDPI journal article supplement (doi:10.3390/ani12162136), 2022-08-19
Supplement: s1 [file s1]

### A. Subgroup analysis of the average daily weight gain outcome by vaccine category

| Groups       | Number of studies | Effect size and 95% C.I |                |          |             |             | Test of null (2-tail) |         | Heterogeneity |       |         |
|--------------|-------------------|-------------------------|----------------|----------|-------------|-------------|-----------------------|---------|---------------|-------|---------|
|              |                   | Point estimate          | Standard error | Variance | Lower limit | Upper limit | Z-value               | P-value | Q-value       | df(Q) | P-value |
| Experimental | 11                | 0.468                   | 0.402          | 0.162    | -0.320      | 1.257       | 1.165                 | 0.244   | 0.794         | 1     | 0.373   |
| Commercial   | 7                 | 1.031                   | 0.486          | 0.237    | 0.078       | 1.984       | 2.119                 | 0.034   |               |       |         |
| Overall      | 18                | 0.697                   | 0.310          | 0.096    | 0.089       | 1.304       | 2.248                 | 0.025   |               |       |         |

### B. Subgroup analysis of the average daily weight gain outcome by vaccination route

| Groups     | Number of studies | Effect size and 95% C.I |                |          |             |             | Test of null (2-tail) |         | Heterogeneity |       |         |
|------------|-------------------|-------------------------|----------------|----------|-------------|-------------|-----------------------|---------|---------------|-------|---------|
|            |                   | Point estimate          | Standard error | Variance | Lower limit | Upper limit | Z-value               | P-value | Q-value       | df(Q) | P-value |
| Intranasal | 3                 | 1.519                   | 0.749          | 0.561    | 0.051       | 2.988       | 2.028                 | 0.043   | 1.674         | 2     | 0.433   |
| Oral       | 12                | 0.446                   | 0.382          | 0.146    | -0.302      | 1.194       | 1.169                 | 0.242   |               |       |         |
| Parenteral | 3                 | 0.849                   | 0.777          | 0.603    | -0.673      | 2.371       | 1.093                 | 0.274   |               |       |         |
| Overall    | 18                | 0.696                   | 0.312          | 0.097    | 0.086       | 1.307       | 2.236                 | 0.025   |               |       |         |
