# Supplementary material for: Evidence-Based Approaches for Determining Effective Target Antigens to Develop Vaccines against Post-Weaning Diarrhea Caused by Enterotoxigenic Escherichia coli in Pigs: A Systematic Review and Network Meta-Analysis
Source: MDPI journal article supplement (doi:10.3390/ani12162136), 2022-08-19
Supplement: s1 [file s1]

**Egger's regression test results for publication bias**

| <b>Items</b>              | <b>Outcomes</b> |                  |            |
|---------------------------|-----------------|------------------|------------|
|                           | <b>Diarrhea</b> | <b>Mortality</b> | <b>DWG</b> |
| <i>Intercept</i>          | -0.98208        | -0.48462         | -4.20753   |
| <i>Standard error</i>     | 0.84484         | 0.47899          | 3.29015    |
| <i>95% Lower limit</i>    | -2.71868        | -1.51942         | -11.18234  |
| <i>95% Upper limit</i>    | 0.75452         | 0.55017          | 2.76727    |
| <i>t-value</i>            | 1.16244         | 1.01177          | 1.27883    |
| <i>df</i>                 | 26              | 13               | 16         |
| <i>P-value (1-tailed)</i> | 0.12781         | 0.16506          | 0.1096     |
| <i>P-value (2-tailed)</i> | 0.25562         | 0.33011          | 0.2192     |
