# Supplementary material for: Evidence-Based Approaches for Determining Effective Target Antigens to Develop Vaccines against Post-Weaning Diarrhea Caused by Enterotoxigenic Escherichia coli in Pigs: A Systematic Review and Network Meta-Analysis
Source: MDPI journal article supplement (doi:10.3390/ani12162136), 2022-08-19
Supplement: s1 [file s1]

### A. Subgroup analysis of diarrhea outcome by vaccine category

| Groups       | Number of studies | Effect size and 95% C.I |             |             | Test of null (2-Tail) |         | Heterogeneity |        |         |
|--------------|-------------------|-------------------------|-------------|-------------|-----------------------|---------|---------------|--------|---------|
|              |                   | Point estimate          | Lower limit | Upper limit | Z-value               | P-value | Q-value       | df (Q) | P-value |
| Commercial   | 9                 | 0.102                   | 0.026       | 0.398       | -3.289                | 0.001   | 0.115         | 1      | 0.734   |
| Experimental | 19                | 0.137                   | 0.050       | 0.381       | -3.817                | 0.000   |               |        |         |
| Overall      | 28                | 0.124                   | 0.055       | 0.279       | -5.027                | 0.000   |               |        |         |

### B. Subgroup analysis of diarrhea outcome based on the vaccination route

| Groups     | Number of studies | Effect size and 95% C.I |             |             | Test of null (2-Tail) |         | Heterogeneity |        |         |
|------------|-------------------|-------------------------|-------------|-------------|-----------------------|---------|---------------|--------|---------|
|            |                   | Point estimate          | Lower limit | Upper limit | Z-value               | P-value | Q-value       | df (Q) | P-value |
| Parenteral | 3                 | 0.120                   | 0.011       | 1.353       | -1.715                | 0.086   | 0.362         | 2      | 0.834   |
| Combined   | 1                 | 0.030                   | 0.000       | 3.298       | -1.462                | 0.144   |               |        |         |
| Oral       | 24                | 0.130                   | 0.053       | 0.318       | -4.474                | 0.000   |               |        |         |
| Overall    | 28                | 0.123                   | 0.054       | 0.281       | -4.974                | 0.000   |               |        |         |
